# High intraspecific growth variability despite strong evolutionary heritage in a neotropical forest

4

5 Sylvain Schmitt<sup>1,\*</sup> , Bruno Hérault<sup>2,3,4</sup> , Géraldine Derroire<sup>5</sup> 

6

7 <sup>1</sup> CNRS, UMR EcoFoG (Agroparistech, Cirad, INRAE, Université des Antilles, Université de  
8 la Guyane), Campus Agronomique, 97310 Kourou, French Guiana

9 <sup>2</sup> CIRAD, UPR Forêts et Sociétés, Yamoussoukro, Côte d'Ivoire

10 <sup>3</sup> Forêts et Sociétés, Université de Montpellier, CIRAD, Montpellier, France

11 <sup>4</sup> Institut National Polytechnique Félix Houphouët-Boigny, INP-HB, Yamoussoukro, Côte  
12 d'Ivoire

13 <sup>5</sup> Cirad, UMR EcoFoG (Agroparistech, CNRS, INRAE, Université des Antilles, Université de  
14 la Guyane), Campus Agronomique, 97310 Kourou, French Guiana

15

16 Correspondence: Sylvain Schmitt, UMR EcoFoG, Campus Agronomique, 97310 Kourou,  
17 French Guiana. Email: [sylvain.m.schmitt@gmail.com](mailto:sylvain.m.schmitt@gmail.com)

18

# Abstract

Individual tree growth is a key determinant of species performance and a driver of forest dynamics and composition. Previous studies on tree growth unravelled the variation in species growth as a function of demographic trade-offs that are partially predicted using functional traits. They have explored the environmental determinants of species growth potential and the variation of intraspecific growth over space and time due to environment and biotic factors. However, variation in individual growth within species remains underexplored for a whole community and the relative role of species' evolutionary heritage and of local environments remains unquantified. Here, based on 36 years of diameter records for thousands of spatialized individuals belonging to 138 species, we assessed individual tree growth potential in a local neotropical forest community in the Amazon basin. We further related variation in individual growth potential with taxonomic levels, local topography, and neighbourhood crowding, before exploring species growth potential link to functional traits and distribution along the phylogeny. We found that most of the variation in growth potential was individual, and that taxonomic structure explained a third of the observed variation. Species growth potential was phylogenetically conserved with positive conservatism up to the genus level in the vast majority of species. Functional traits of roots, wood and leaves together predicted species growth potential. Phylogeny suggested joint selection of species' growth strategies and associated functional traits during convergent evolutions. Finally, neighbourhood crowding had a significant effect on individual growth potential, although much of this inter-individual variation remains largely unexplained and the underlying ecological and evolutionary factors are still little explored. The high intraspecific variation observed could allow individuals in these hyperdiverse ecosystems to respond to the variable light and competitive conditions offered by successional niches during forest gap dynamics.

## 44 Introduction

45 Individual growth is a key determinant of species performance (Violle et al., 2007) and a  
 46 driver of forest dynamics (Hérault et al., 2010) and composition (Russo et al., 2008). Thus, a  
 47 comprehensive understanding of the determinants of tree growth is of primary importance for  
 48 predicting the fate of tropical forests, especially in the face of increasing anthropogenic  
 49 disturbances. Tree growth plays a major role in the ecological strategies of tree species  
 50 through demographic trade-offs (Rüger et al., 2019) including a growth-mortality trade-off  
 51 (Aubry-Kientz et al., 2015; Philipson et al., 2014; Wright et al., 2010). Fast-growing species  
 52 are opposed to slow-growing species (Aubry-Kientz et al., 2015; Phillipson et al., 2014;), with  
 53 lower support costs but at greater risk of damage and increased mortality (King et al., 2006).  
 54 To forecast the dynamics of tropical forests, efforts have been made to predict the growth of  
 55 species. Functional traits have been widely explored and used to predict species growth  
 56 (Hérault et al., 2011, Visser et al., 2016, Osazuwa-Peters et al., 2017, Poorter et al., 2010).  
 57 Functional traits are defined as phenotypic traits that impact on fitness through their effect on  
 58 individual performance, which is defined as the ability to recruit, grow, survive and reproduce  
 59 (Violle et al. 2007). Functional traits are therefore expected to play a role in species growth  
 60 (but see Yang et al., 2018). Wood density has been shown to be an important determinant of  
 61 species growth potential (King et al., 2005; King et al., 2006; Hérault et al., 2011; Visser et  
 62 al., 2016), as well as species maximum diameter and height,  $\delta^{13}C$  of leaf (Hérault et al.,  
 63 2011), wood anatomical features (Osazuwa-Peters et al., 2017; Poorter et al., 2010) and  
 64 hydraulic conductance (Poorter et al., 2010).

65  
 66 Light interception was recognised early on as a key factor in the growth of species (King et  
 67 al., 2005). The role of light has been demonstrated experimentally in seedlings with species  
 68 showing a trade-off between shade tolerance and establishment in gaps (Baraloto et al.,  
 69 2005). Fast-growing species are found in environments with high access to light, where

70 shade-tolerant species show reduced growth (Wright et al., 2010). Treefalls open gaps in the  
71 forest creating bright environments and reduced competition from large trees. During forest  
72 succession, gaps are filled by vegetation, resulting in shadier environments and increased  
73 competition from large trees. This process, called forest gap dynamics (Martinez-Ramos *et*  
74 *al.*, 1989), produces successional niches, which select species with a variety of survival and  
75 growth strategies (Hérault *et al.*, 2010; Rüger *et al.*, 2009). Fast-growing pioneer species  
76 quickly colonise treefall gaps, while slower-growing late-successional species gradually  
77 establish themselves in shadier environments (Craven *et al.*, 2015). Species distribution is  
78 also driven by soil (Kuper et al., 2019) shaping indirectly the structure of the community.  
79 Nutrient availability together with water shape species performance with fast-growing  
80 species dying more on the poorest habitat and slow-growing species being outcompeted in  
81 resource-rich habitats (Russo et al., 2008).

82

83 Access to light and nutrients, modulated by forest gap dynamics, topography and  
84 competition, also determines variation in individual growth within species over space and  
85 time. Indeed, species-specific functional traits still poorly predict individual tree rates (Yang  
86 et al., 2018), partly because they ignore individual variation, and because critical aspects of  
87 demographic rates are not captured by most measured functional traits. Individual- and  
88 species-based approaches to functional traits are conceptually fundamentally different  
89 (Poorter et al., 2018): the species-based approach focuses on potential and the individual-  
90 based approach on realised traits and growth rates. Forest gap dynamics, notably through  
91 light interception variation, is a key factor shaping the growth of individuals within species  
92 with increased tree growth near canopy openings (Hérault et al., 2010; Schmitt *et al.*, 2022).  
93 Similarly, individuals with greater investment in biomass achieved higher growth rates with a  
94 suggested allocation in light capture (Umaña et al., 2018). Topography is driving both water  
95 and nutrient availability in tropical forests through the dissolution of iron oxides, litter- and  
96 tree-fall transfers and waterlogging (Ferry et al. 2010; John et al. 2007). Therefore, individual  
97 growth within species is faster in valleys than on ridges in neotropical forests (Fortunel et al.,

2018; but see O'Brien Escudero 2021). The effects of abiotic determinants on individual growth within species can be mediated by biotic interactions and tree ontogeny. Neighbourhood crowding through competition for resources, including light, nutrients and water, but also potentially through facilitation, is known to modulate tree growth (Uriarte et al., 2004; Lewis and Tanner 2000). Individuals' responses to neighbourhood crowding depend on the species identity of the focal tree and the composition of its neighbours (Uriarte et al., 2004; Lewis and Tanner 2000). Neighbourhoods interact with other abiotic factors, e.g. growth is faster in bottomland than on higher ground, but neighbourhood crowding has a stronger negative effect on growth in bottomland than in higher ground for one in ten species (Fortunel et al., 2018). Finally, tree size, as a proxy for ontogeny, is a major determinant of individual growth within species (Rees et al., 2010; Hérault et al., 2011; Gibert et al., 2016), even though tree size was shown to be less important for growth than light (Rüger et al., 2011).

However, most of the studies of intraspecific variation in growth were carried out for a limited number of species of a community, and the consistency of the observed patterns for across species of a community remains underexplored. This prevents assessing the relative contribution to individual growth variability of species evolutionary heritage and individual adaptation and plasticity in response to local environments. Individual trees however differ in many dimensions within and among species with genetic heritage and life history that may influence their growth response to local abiotic environments and biotic interactions (Le Bec et al., 2015). Genetic processes within and among species hold promises for understanding tree growth (Grattapaglia et al., 2009). Evolutionary heritage resulted in convergent species growth within tree genera from the Amazon Basin (de Souza et al., 2016). A recent study further suggested individual adaptation of tree growth within species to the successional niches generated by tropical forest gap dynamics in the tropical species from the *Symphonia* genus (Schmitt et al., 2022). The topographic origin of parent trees was also shown to determine the individual's growth response of the offspring to increasing abundance of

neighbours (O'Brien Escudero 2022). Altogether, these results plead for a better integration of species and individuals in tree growth studies, in order to better link individual tree growth to genetic, phylogenetic and environmental variations.

Here, we assessed tree growth potential for most individuals in a local neotropical forest community in the Amazon basin, and related variation in individual growth potential to taxonomic levels, local topography and neighbourhood crowding, in addition to the species phylogeny. Based on 36 years of diameter records for 7,961 of spatialized individuals belonging to 138 species, we constructed individual ontogenetic growth trajectories to infer individual growth potential using a hierarchical Bayesian model. We used individual growth potential in a linear mixed model with topography, neighbourhood crowding and taxonomic level to explore the environmental drivers and evolutionary heritage of tree growth. We further explored the phylogenetic signal of species growth potential and the role of previously published functional traits in explaining species growth potential. We specifically addressed the following questions:

1. What is the importance of evolutionary history in the growth potential of tropical trees?
2. Can functional traits help predict species growth potential?
3. How important is the variability of individual growth potential and how does the local environment influence it?

We hypothesised species growth to have a phylogenetic signal with conserved interspecific growth in part influenced by species functional traits. We expected high intraspecific variation in tree growth influenced by topography and neighbourhood crowding.

# Material and Methods

## Study site

The study was conducted in the Guiana Shield, in the coastal region of French Guiana, at the Paracou field station (5°18'N, 52°53'W). The site is characterised by an average annual rainfall of 3041 mm and an average air temperature of 25.71°C (Aguilos et al. 2018). A rich tropical forest occupies this lowland area characterised by heterogeneous microtopographic conditions with numerous small hills generally not exceeding 45 m in altitude (Gourlet-Fleury et al. 2004). The site includes fifteen 6.25 ha plots and a 25 ha plot with trees mapped to the nearest metre and censused (diameter at breast height >10 cm) every 1 to 5 years since 1985. Nine of the plots were intentionally manipulated in 1986 with a range of disturbance intensities that created a variety of biotic environments (details of the experiment in Hérault and Pioniot 2018).

## Species and individuals

We focused on trees located 20 m from any plot edge for neighbourhood analyses. We used only (i) trees recruited since the beginning of censuses to exclude large diameter trees that show little to no variation in their growth trajectories, (ii) trees with at least 10 measurements to better assess their complete growth trajectories and (iii) species with at least 10 trees meeting the previous requirements for a good representation of intraspecific variability. We did include disturbed plots in our study in order to explore a greater variety of neighbourhood crowding.

## Individual growth

We first explored with a reduced dataset the best model shape (Tab. S1) and the best hierarchical integration of individual and species effects (Tab. S2) to infer individual growth

potential. Based on goodness of fit (likelihood), cross-validation (leave-one-out estimate of the expected log pointwise predictive density, see Vehtari *et al.*, 2007) and prediction quality (root mean square error of prediction), we chose to model tree diameter over time using the sum of the arithmetic series of the annual tree growth rate observed at the census year for each individual with a Gaussian distribution. At any year  $t$  since tree recruitment, individual annual growth rate  $AGR_{i,t}$  can be defined following a Gompertz model (Hérault *et al.*, 2011) based on individual diameter at breast height from previous census  $DBH_{i,t-1}$ :

$$AGR_{i,t} = Gmax_i \times \exp\left(-\frac{1}{2} \left[ \frac{\log(DBH_{i,t-1}/Dopt_i)}{Ks_i} \right]^2\right)$$

with  $Dopt_i \sim N(Dopt_s, \sigma D)$  and  $Ks_i \sim N(Ks_s, \sigma K)$

where  $Gmax_i$  is the individual maximum growth potential,  $Dopt_i$  is the optimal diameter at which the individual reaches its maximum growth potential, and  $Ks_i$  is the kurtosis defining the width of the bell-shaped growth-trajectory (see figure 1 in Hérault *et al.*, 2011).  $Dopt_i$  and  $Ks_i$  are random effects centred on species parameters  $Dopt_s$  and  $Ks_s$  with associated variances  $\sigma D$  and  $\sigma K$ . Thus, annual individual diameter  $DBH_{i,t}$  can be calculated as previous year individual diameter  $DBH_{i,t-1}$  plus individual annual growth rate  $AGR_{i,t}$ :

$$DBH_{i,t} = DBH_{i,t-1} + AGR_{i,t}$$

This arithmetic serie can be integrated from individual recruitment to build individual growth trajectory with annual individual diameter  $H_{i,t}$ :

$$DBH_{i,t} = DBH_{i,0} + \sum_{y=0}^{y=t} AGR_{i,y}$$

where  $DBH_{i,0}$  is individual diameter at recruitment. Finally, a model can be fitted to predict annual individual diameter  $DBH_{i,t}$  with observed diameter from censuses using a Gaussian distribution:

$$DBH_{i,t} \sim N\left(DBH_{i,0} + \sum_{y=0}^{y=t} AGR_{i,y}, \sigma\right)$$

This model was fitted for every census  $t$  at which the individual was measured. A Bayesian method was employed to infer parameters, in particular individual growth potential  $Gmax_i$ ,



using the stan language (Carpenter *et al.*, 2017) and the *rstan* package (Stan Development Team, 2018) in the R environment (R Core Team, 2020).

## Descriptors of individual growth potential

We used the mean neighbourhood crowding index (NCI, Uriarte *et al.*, 2004) over the last 30 years, an indirect measurement of access to light and forest gap dynamics for each individual. The mean neighbourhood crowding index  $NCI_i$  from tree individual  $i$  was calculated as follows:

$$NCI_i = \overline{\sum_{(j|\delta_{i,j} < 20m)} DBH_{j,t}^2 \times \exp\left(-\frac{1}{4}\delta_{i,j}\right)}$$

with  $DBH_{j,t}$  the diameter of the neighbouring tree  $j$  in year  $t$  and  $\delta_{i,j}$  its distance to the individual tree  $i$ .  $NCI_i$  is computed for all neighbours at a distance  $\delta_{i,j}$  inferior to the maximum neighbouring distance of 20 metres. The power of neighbours  $DBH_{j,t}$  effect was set to 2 to represent an area. The decrease of neighbours' diameter effect with distance was set to -0.25 to represent trees at 20 metres of the focal trees having 1% of the effect of the same tree at 0 metres.  $NCI_i$  is computed as the mean of  $NCI_{i,t}$  per census over the last 30 years denoted by the overline in the equation.

We used the topographic wetness index (TWI) as proxies of the distribution of soil water and nutrients in Paracou (Schmitt *et al.* 2021). Waterlogging and topography have been highlighted as crucial for forest dynamics (Ferry *et al.* 2010), species-habitat relationships (Engelbrecht *et al.* 2007), and phenotypic variation (Schmitt *et al.* 2020). TWI was derived from a 1-m-resolution digital elevation model using SAGA-GIS (Conrad *et al.* 2015) based on a LiDAR campaign of the whole Paracou field station done in 2015.

We also tested the link between functional traits and species growth using the mean values of the 120 species of Vleminckx *et al.* (2021) shared with our study. Vleminckx *et al.* (2021)

functional data included 19 leaf, stem and root traits. Leaf traits included carbon, nitrogen, potassium, phosphorus, calcium, and chlorophyll content, carbon 13 isotopic ratio, toughness, thickness, area and specific area. Stem traits included sapwood specific gravity and trunk bark thickness. Root traits included specific tip abundance, specific length, wood specific gravity and fine roots tissue density and diameter.

## Analyses

To study the effect of phylogeny and environment, we investigated the effects of family, genus, species, topography (TWI) and neighbourhood (NCI) indices on individual growth potential (Gmax) with a linear mixed model. Environmental variables (TWI and NCI) were used as fixed effects, while phylogenetic variables (family, genus, and species) were used as random effects. We reported the resulting marginal (fixed effects alone) and conditional (fixed and random effects) goodness of fit ( $R^2$ , Nakagawa & Schielzeth 2013).

We further investigated species growth potential across the phylogeny. To account for the lognormal distribution of individual growth potential within species, we used the median as a measure of species growth potential ( $Gmax_s = Median(Gmax_i)$ ). We tested the phylogenetic signal of species growth potential with multiple measures including Pagel's  $\lambda$  (Keck et al., 2016). We further computed the phylogenetic correlogram of species growth potential using partitive phylogenetic distance and tested its significance with 999 bootstrap assuming brownian motion. We explored the phylogenetic signal structure across the phylogeny with the local indicator of phylogenetic association.

We finally explored the link between functional traits and species growth potential. We used a linear model with a step selection of the best model explaining species log-transformed growth potential with log-transformed functional traits. We measured functional traits relative importance in explaining species growth potential averaging over orderings of regressors

(Groemping 2007). We finally compared the taxonomic and phylogenetic structures of functional traits with those of species growth potential using linear mixed models with random taxonomic levels (family, genus, and species) and phylogenetic correlograms. We used the *tidyverse* (Wickham *et al.*, 2019), *lme4* (Bates *et al.*, 2015), *phylosignal* (Keck *et al.*, 2016), and *ggtree* (Yu 2020) packages in the R environment (R Core Team, 2020) for all analyses.

## Results

We recorded 117 688 diameter measurements in the local community across 7 961 individuals belonging to 138 species, 95 genera and 38 families. We found most of the variation in growth potential to be among individuals within species ( $\sigma = 0.45$ , Tab. 1), then among genera within families ( $\sigma = 0.09$ ), then among species within genera ( $\sigma = 0.04$ ) and among families ( $\sigma = 0.06$ ). The taxonomic structure explains about a third of the observed variation in individual growth potential (Conditional  $R^2 = 0.318$  against Marginal  $R^2 = 0.031$ ). The neighbourhood crowding index (NCI) had a marked negative significant effect on individual growth potential ( $\beta = -0.99, p < 0.001$  alone Fig. 1B, and  $\beta = -0.53, p < 0.001$  knowing taxonomy Tab. 1) which explained 10% of the observed variation alone ( $R^2 = 0.102$ , Fig. 1B) and 3% of the observed variation knowing taxonomy (Marginal  $R^2 = 0.031$ , Tab. 1). The topographic wetness index had no effect on individual growth potential ( $\beta = -0.04, p = 0.260$  Tab. 1).

Species growth potential was significantly structured in the phylogeny (Pagel's  $\lambda = 0.78, p < 0.001$ , Fig. 1A, Tab. S3). Phylogenetic autocorrelogram revealed a short distance significant positive association and a long distant significant negative association of species growth potential in the phylogeny (Fig. S1). The local indicator of phylogenetic association highlighted the conservation of species growth potential at the genus level (Fig. S2), as illustrated for instance with fast growing species from the *Cecropia* genus opposed to slow

growing species from the *Eschweilera* genus (Fig. 1A). However, a few species have different growth potential in the same genus, such as slow growing *Drypetes variabilis* opposed to fast growing *Drypetes fanshawei*.

Functional traits explained 40% of the observed variation of species growth potential among 120 tropical tree species ( $R^2 = 0.394$ ). Leaf potassium content, sapwood specific gravity, fine roots diameter and specific length had significant negative effects on species growth potential, while leaf nitrogen content had a significant positive effect (Tab. 2). Sapwood specific gravity and leaf nitrogen content had the largest relative importance (resp.  $R^2 = 0.18$  and  $R^2 = 0.11$ ), while other traits had small relative importance ( $R^2 \leq 0.04$ ). Moreover, these 6 functional traits had a phylogenetic autocorrelogram similar to species growth potential with a short distance significant positive association, stronger for sapwood specific gravity than other traits (Fig. S3).

Table 1: Effects of phylogeny and environment on individual growth potential. We investigated the effects of family, genus, species, topography (TWI) and neighbourhood crowding (NCI) indices on individual growth potential (Gmax) with a linear mixed model. First rows show estimates, confidence intervals (CI) and significance (p-value) for environmental fixed effects. Middle rows show estimates for variance components from phylogenetic random effects. The last row shows marginal (fixed effects alone) and conditional (fixed and random effects) goodness of fit.

| $\log(Gmax_i)$                                       |                  |               |                  |
|------------------------------------------------------|------------------|---------------|------------------|
| <i>Predictors</i>                                    | <i>Estimates</i> | <i>CI</i>     | <i>p-value</i>   |
| Intercept                                            | 4.00             | 3.48 – 4.51   | <b>&lt;0.001</b> |
| $\log(NCI_i)$                                        | -0.53            | -0.59 – -0.46 | <b>&lt;0.001</b> |
| $\log(TWI_i + 1)$                                    | -0.04            | -0.10 – 0.03  | 0.260            |
| <b>Random effects</b>                                |                  |               |                  |
| Residual                                             | 0.45             |               |                  |
| Species   Genus   Family                             | 0.04             |               |                  |
| Genus   Family                                       | 0.09             |               |                  |
| Family                                               | 0.06             |               |                  |
| Marginal R <sup>2</sup> / Conditional R <sup>2</sup> | 0.031 / 0.32     |               |                  |

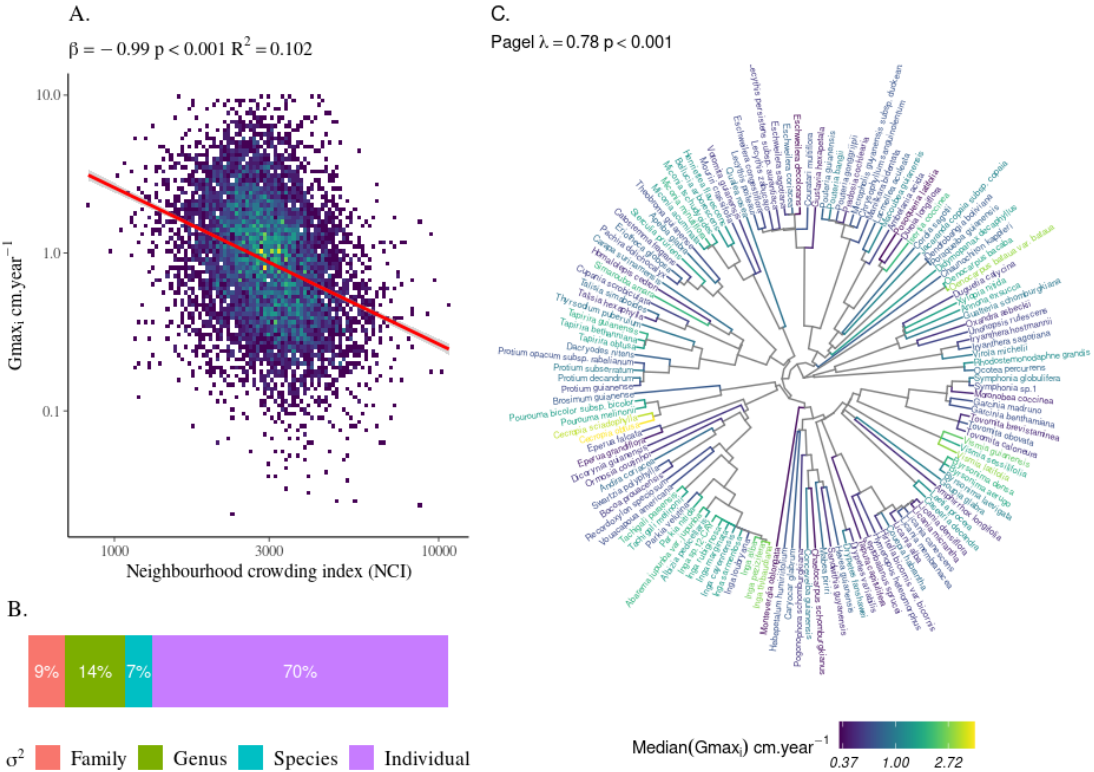

Figure 1: Variation in the growth potential of individuals and species as a function of neighbourhood crowding, taxonomic levels or across phylogeny. **A.** Individual growth potential ( ) is significantly decreasing with neighbourhood crowding index (NCI, ). **B.** The variation of individual growth potential ( ) across taxonomy show most of the variation at the individual ( , Tab. 1), then explained by genus ( ) before species ( ) and family ( ). **C.** The distribution of species growth potential (Median[ ]) across the phylogeny from slow growing species in dark blue to fast growing species in yellow (log-scale) is phylogenetically structured (Pagel's ) with a significant positive autocorrelation to a phylogenetic partistic distance below 100 (Fig. S2), corresponding to the genus level (Tab. 1).

Table 2: Effects of functional traits on species growth potential. We extracted traits from Vleminckx et al. (2021) for the 120 species shared with our study, and used a linear model with a step selection of the best model explaining species growth potential with log-transformed growth potential and functional traits. We thus selected 6 root, stem and leaf functional traits. Columns show estimates, confidence intervals (CI), significance (p-value), and relative importance ( $R^2$ ) for selected functional traits. The last row shows raw and adjusted goodness of fit.

| $\log(Gmax_s)$                           |                  |               |                  |                      |
|------------------------------------------|------------------|---------------|------------------|----------------------|
| <i>Predictors</i>                        | <i>Estimates</i> | <i>CI</i>     | <i>p-value</i>   | <i>R<sup>2</sup></i> |
| Intercept                                | -0.01            | -0.15 – 0.13  | 0.882            |                      |
| leaf toughness                           | 0.18             | -0.01 – 0.37  | 0.063            | 0.02                 |
| leaf nitrogen content                    | 0.38             | 0.22 – 0.55   | <b>&lt;0.001</b> | 0.11                 |
| leaf potassium content                   | -0.24            | -0.41 – -0.07 | <b>0.005</b>     | 0.04                 |
| sapwood specific gravity                 | -0.57            | -0.76 – -0.39 | <b>&lt;0.001</b> | 0.18                 |
| fine roots diameter                      | -0.49            | -0.82 – -0.17 | <b>0.003</b>     | 0.04                 |
| specific root length                     | -0.35            | -0.67 – -0.02 | <b>0.035</b>     | 0.03                 |
| R <sup>2</sup> / R <sup>2</sup> adjusted | 0.424 / 0.394    |               |                  |                      |

## Discussion

Using 36 years of diameter records for thousands of spatialized individuals belonging to 138 species, we found that the evolutionary heritage of species shaped individual growth trajectories, explaining up to one third of the observed variation in growth potential among the eight thousand individuals studied. Functional traits of wood, leaves and roots together predicted species growth potential, showing that multiple functional dimensions determine the performance of tropical tree species in their environments. Phylogenetic correlograms suggested joint selection of species' growth strategies and associated functional traits during convergent evolutions. Nevertheless, at the individual tree level, forest gap resulted in fast-growing trees in high light conditions with reduced competition, as opposed to slow-growing trees in low light conditions with strong competition. But the ecological and evolutionary drivers of the high variability in individual growth potential remain largely undetermined, and the underlying factors, which include phenotypic plasticity and genetic adaptations, are little explored. The high intraspecific variation observed could allow individuals in these hyperdiverse ecosystems to respond to the variable light and competitive conditions offered by successional niches during forest gap dynamics, in addition to the many other potential environmental dimensions that shape the coexistence of species.

## Evolutionary history shapes the growth of tropical trees

We found that evolutionary history shaped individual growth potential. Previous studies already highlighted regionally a phylogenetic signal in species growth potential in the Amazon Basin, with evolutionarily related genera having more similar growth values than expected by chance (de Souza *et al.*, 2016). Regionally, woody biomass and tree size also showed a strong phylogenetic signal in tropical dry forests (de Aguiar-Campos *et al.*, 2020), besides longevity rather than growth determined biomass (Körner 2017). Similarly, Cadotte *et al.*, (2009) found evolutionary relationships explaining grasslands productivity. Thus,



evolutionary history shapes observed phylogenetic and functional diversity at the regional scale, with for instance lasting influences from the Paleoclimate (Svenning *et al.*, 2015; Bosela *et al.*, 2016). Our results are in agreement as we also identified a strong phylogenetic signal in species growth potential with positive phylogenetic correlation up to the genus level, showing that previous regional scale results hold locally. To our knowledge, our study is the first attempt to link individual growth potential to species growth potential. Using taxonomy as a proxy for evolutionary heritage of species, we found that the evolutionary history of species explained up to one third of the observed variation in growth potential among the eight thousand individuals studied. Thus, evolutionary history is an important determinant of individual variation in growth stronger than the direct effect of the environment, at least for the topography and neighbourhood crowding tested here.

Several convergent evolution resulted in similar growth patterns of species within genera with, for instance, repeated evolution of fast-growing species in *Urticaceae*, *Fabaceae*, *Hypericaceae*, and *Melastomataceae* families with species respectively belonging to the *Cecropia*, *Inga*, *Vismia* and *Miconia* genera. This pattern might be explained by repeated evolution constrained by forest gap dynamics, leading to shade-tolerance under closed canopies as opposed to fast-growing pioneer species in light gaps (de Souza *et al.*, 2016). Indeed, *Cecropia*, *Visimia* and *Miconia* are for instance recognized as pioneer species colonising first light gaps after a treefall (Dalling *et al.*, 1998). Convergent evolutions of habitat specialisation could also explain the divergent growth of genera within families. For instance at the species level, Fine *et al.*, (2014) evidenced specialisation to white sands or flooded soils within *Protieae*. Nevertheless, the fact that topography and forest gap dynamics, two major determinants of the local community (e.g. Ferry *et al.*, 2010; Molino and Sabatier 2001), have less explanatory power than taxonomy reveals the importance of past evolutionary constraints on the growth trajectories of individual trees through species heritage compared to the direct effect of the current environment to which individual trees

could respond through microadaptations and phenotypic plasticity (e.g. Schmitt *et al.*, 2021; 2022).

Taken together, our results therefore partly support species-averaged community ecology approaches, at least for growth trajectories (but see last paragraph). Swenson *et al.*, (2013) suggested the use of phylogenetic approaches to understand community assembly. However, phylogeny alone is not sufficient to predict demographic rates (Che-Castaldo *et al.*, 2018). Indeed, phylogenetic approaches must be conducted with caution given the high remaining intraspecific variability (see last paragraph) and the differences observed among closely-related species.

## Multiple functional dimensions together predict the species growth potential

Using the 120 species in common with Vleminckx *et al.* (2021), we found six functional traits explaining an important part of variation in species growth potential (40%). Sapwood specific gravity was already shown as a major predictor of species growth (King *et al.*, 2005; King *et al.*, 2006; Hérault *et al.*, 2011; Visser *et al.*, 2016), with fast-growing species investing less in wood resulting in a low density as opposed to slow-growing ones. Leaf nitrogen content was the second most important predictor in our study, with nitrogen-rich species growing faster, as already observed for pioneer species (Aidar *et al.*, 2003), and in rich environments (Russo *et al.*, 2008). Leaf potassium and toughness were also small predictors of species growth potential. Finally, root traits also predicted species growth potential with fast-growing species investing less in their root systems with decreased fine roots diameters and higher specific root length, as already shown for temperate species (Comas, Bouma and Eissenstat 2002, Comas and Eissenstat 2004) but never in the tropics, in the limit of our knowledge. Soil heterogeneity can be expected to play a key role in shaping root traits (Vleminckx *et al.*, 2021), while the dynamics of forest gaps cannot be excluded either (Xiang *et al.*, 2013).

Future research on the role of root traits in tropical tree growth is thus particularly promising given that tropical forests harbour the greatest diversity of root characteristics (Ma *et al.*, 2018). Interestingly, species growth potential is better predicted by the combination of traits from roots, wood and leaf, in accordance with the idea of multiple functional dimensions that allow tropical tree species to optimise their performance in a given environment Vleminckx *et al.* (2021), while participating together in a whole plant economic spectrum (Reich 2014).

Finally, we found a similar phylogenetic structure between the 6 functional traits and species growth potential, with significant and positive phylogenetic correlation at short distance, in particular in sapwood specific gravity (de Souza *et al.*, 2016). The traits explaining the most species growth had the strongest positive phylogenetic correlation (e.g. sapwood specific gravity), while traits such as leaf potassium content and toughness had smaller positive phylogenetic correlation only significant to a short phylogenetic distance (<50). The similarity between phylogenetic correlograms suggests a joint selection of species growth strategies and associated functional traits during convergent evolutions. This result further supports the use of phylogeny and related traits to predict species growth trajectories and potential demography (Swenson 2014; Tucker *et al.*, 2018; Paquette *et al.*, 2015).

## Individual growth potential is influenced by forest gap dynamics but remains largely unexplained

We found evolutionary heritage shaping the individual growth of tropical trees, with functional traits as important predictors of species growth potential. However, we still observe a huge intraspecific variation with individual growth potential varying widely within species (CVlog = 98% [35-430%]). The growth trajectories of individual trees are strongly and negatively affected by the average neighbourhood crowding over the last 30 years (10%), which can be related to the mosaic of light and competition environments shaped by forest gap dynamics (Schmitt *et al.*, 2022). In a nutshell, we observe fast-growing trees in high-light conditions

with decreased competition opposed to slow-growing trees in low-light conditions with strong competition within and among species. Fast-growing pioneer species opposed to slow-growing species under closed-canopies are widely known and expected at the interspecific level (Dalling *et al.*, 1998; Molino and Sabatier 2001; King *et al.*, 2005; Hérault *et al.*, 2011), but we also evidenced fast-growing individual opposed to slow-growing individual within species along successional niches, advocating for a wide niche successional-breadth of tropical tree species (e.g. Schmitt *et al.*, 2022 for *Symphonia* species). The effect of competition and its reduction has already been suggested as a factor increasing tree radial growth within species in the context of selective logging, especially within shade-tolerant species (Peña-Claros *et al.*, 2008). Indeed, logging gaps, with increased light access, results in increased tree growth at short distance from the gap, especially within slow-growing species (Hérault *et al.*, 2010). Rare species have been also shown to be more sensitive to light variation (Rüger *et al.*, 2011). The effect of crowding can be a direct limit to light access expected in successional niches, but the effect of neighbours identity found in tropical trees (Potvin *et al.*, 2008) also suggest other above- and below-ground competition and facilitation processes. In short, forest gap dynamics with tree fall results in successional niches ranging from high light and low competition after recent tree fall to low light and high competition in closed canopies, and we found along this gradient fast-growing species and individuals within species in early-succession niches as opposed to slow-growing species and individuals within species in late-succession niches.

Nevertheless, forest gap dynamics only explained a tenth of the high variation of individual growth potential within species. Topographic position, proxied with topographic wetness index, did not influence the individual growth variation within species in our study (but see O'Brien and Escudero 2021), despite its known importance in tropical forest dynamics (Ferry *et al.*, 2010). The role of topography on individual growth potential was weak, but we can assume that topography shapes species growth through species evolutionary heritage, as several species studied showed locally pervasive habitat preferences along topography

(Allié *et al.*, 2018; Schmitt *et al.*, 2021b) and microgeographic adaptations to topography (Schmitt *et al.*, 2021). Consequently, ecological and evolutionary factors of individual growth potential remain largely undetermined. And the process through which forest gap dynamics and undetermined factors affect individual growth potential remains also underexplored. The spatio-temporal variation of forest gap dynamics led to assume growth potential variation within species to be due to phenotypic plasticity (dos Santos *et al.*, 2020). However, recent studies revealed local adaptation (O'Brien and Escudero 2021) and microadaptation (Schmitt *et al.*, 2022) of individual trees within species to neighbourhood crowding and competition resulting in varying individual growth potential. Thus forest gap dynamics could have both a strong evolutionary heritage on species and shapes genotypes within species with strong spatio-temporal variations (Schmitt *et al.*, 2022).

Intraspecific variability in performance can have strong implications for species coexistence (Chesson 2000, Clark 2010). Clark (2010) suggested that intraspecific variability allows species to differ in the distribution of their responses to the environment and thus to pass environmental filtering: an individual may persist in a given environment with a suitable phenotype while the same environment would have filtered out the average phenotype of the species. This hypothesis is consistent with theories that predict the coexistence of a greater number of species, with competition being stronger within species, among individuals, than among species (Chesson 2000). Modelling approaches further supports the hypothesis that intraspecific genetic and phenotypic variability promotes species coexistence (Lichstein *et al.*, 2007). In the case of forest gap dynamics, late-successional species have been shown to have more variation in response to competition and light variation than early-successional species (Peña-Claros *et al.*, 2008; Hérault *et al.*, 2010). The high intraspecific variation observed (CVlog = 98%) could therefore allow individuals in these hyperdiverse ecosystems to adjust to the variable conditions of light and competition offered by the successional niches during the closure of the forest gaps, in addition to the other numerous potential niches shaping the high-dimensional coexistence of species (Clark 2010). Consequently, the

methodology used in our study paves the way to future research on determinants and processes shaping tree growth within and among species. The combination of studies from forest censuses (e.g. this study), modelling approaches (e.g. Schmitt *et al.*, 2020b), and experimental studies (e.g. O'Brien and Escudero 2021) holds promise for a better understanding of tree performance within and among species, with the potential to better explain and predict species coexistence and forest dynamics. In particular, linking individual genotypes within species to forest gap dynamics, topography and individual growth potential (Schmitt *et al.*, 2022) among several species to extrapolate to the community level seems a promising approach to elucidate the determinants of tree growth.

## Acknowledgements

We are grateful to Pascal Petronelli, Julien Engel, Christopher Baraloto and the CIRAD inventory team for their tremendous work in tree inventory and botanical identification, without which this entire study would simply not have been possible.

## Funding

This research received no specific grant.

## Conflict of interest disclosure

The authors declare they have no conflict of interest relating to the content of this article.

## Data, script and code accessibility

DBH and spatial positions of individuals were extracted from the Paracou Station database, for which access is modulated by the scientific director of the station

496 (<https://paracou.cirad.fr>). Scripts used for analyses can be found on GitHub  
 497 (<https://github.com/sylvainschmitt/treegrowth>).

## 498 Authors contribution

499 SS conceived the ideas and designed the methodology. SS, BH, and GD analysed model  
 500 outputs. SS led the writing of the manuscript. All authors contributed critically to the drafts  
 501 and gave final approval for publication.

## 502 References

- 503 Aguilos, M., Stahl, C., Burban, B., Hérault, B., Courtois, E., Coste, S., ... Bonal, D.  
 504 (2018). Interannual and Seasonal Variations in Ecosystem Transpiration and  
 505 Water Use Efficiency in a Tropical Rainforest. *Forests*, 10(1), 14.  
 506 <https://doi.org/10.3390/f10010014>
- 507 Aidar, M. P. M., Schmidt, S., Moss, G., Stewart, G. R., & Joly, C. A. (2003). Nitrogen  
 508 use strategies of neotropical rainforest trees in threatened Atlantic Forest. *Plant,*  
 509 *Cell and Environment*, 26(3), 389–399. [https://doi.org/10.1046/j.1365-](https://doi.org/10.1046/j.1365-3040.2003.00970.x)  
 510 [3040.2003.00970.x](https://doi.org/10.1046/j.1365-3040.2003.00970.x)
- 511 Allié, E., Péliissier, R., Engel, J., Petronelli, P., Freycon, V., Deblauwe, V., ... Baraloto,  
 512 C. (2015). Pervasive local-scale tree-soil habitat association in a tropical forest  
 513 community. *PLoS ONE*, 10(11), e0141488.  
 514 <https://doi.org/10.1371/journal.pone.0141488>
- 515 Aubry-Kientz, M., Rossi, V., Boreux, J.-J., & Hérault, B. (2015). A joint individual-based  
 516 model coupling growth and mortality reveals that tree vigor is a key component of  
 517 tropical forest dynamics. *Ecology and Evolution*, 5(12), 2457–65.  
 518 <https://doi.org/10.1002/ece3.1532>
- 519 Aubry-Kientz, M., Rossi, V., Wagner, F., & Hérault, B. (2015). Identifying climatic drivers  
 520 of tropical forest dynamics. *Biogeosciences*, 12(19), 5583–5596.  
 521 <https://doi.org/10.5194/bg-12-5583-2015>
- 522 Baraloto, C., Goldberg, D. E., & Bonal, D. (2005). Performance trade-offs among  
 523 tropical tree seedlings in contrasting microhabitats. *Ecology*, 86(9), 2461–2472.  
 524 <https://doi.org/10.1890/04-1956>



- 525 Bates, D., Mächler, M., Bolker, B. M., & Walker, S. C. (2015). Fitting linear mixed-  
526 effects models using lme4. *Journal of Statistical Software*, 67(1).  
527 <https://doi.org/10.18637/jss.v067.i01>
- 528 Bauman, D., Fortunel, C., Cernusak, L. A., Bentley, L. P., McMahon, S. M., Rifai, S. W.,  
529 ... Malhi, Y. (2021). Tropical tree growth sensitivity to climate is driven by species  
530 intrinsic growth rate and leaf traits. *Global Change Biology*, (June), 1–19.  
531 <https://doi.org/10.1111/gcb.15982>
- 532 Bosela, M., Popa, I., Gömöry, D., Longauer, R., Tobin, B., Kyncl, J., ... Büntgen, U.  
533 (2016). Effects of post-glacial phylogeny and genetic diversity on the growth  
534 variability and climate sensitivity of European silver fir. *Journal of Ecology*, 104(3),  
535 716–724. <https://doi.org/10.1111/1365-2745.12561>
- 536 Cadotte, M. W., Cavender-Bares, J., Tilman, D., & Oakley, T. H. (2009). Using  
537 phylogenetic, functional and trait diversity to understand patterns of plant  
538 community productivity. *PLoS ONE*, 4(5), 1–9.  
539 <https://doi.org/10.1371/journal.pone.0005695>
- 540 Carpenter, B., Gelman, A., Hoffman, M. D., Lee, D., Goodrich, B., Betancourt, M., ...  
541 Riddell, A. (2017). Stan: A Probabilistic Programming Language. *Journal of*  
542 *Statistical Software*, 76(1). <https://doi.org/10.18637/jss.v076.i01>
- 543 Che-Castaldo, J., Che-Castaldo, C., & Neel, M. C. (2018). Predictability of demographic  
544 rates based on phylogeny and biological similarity. *Conservation Biology*, 32(6),  
545 1290–1300. <https://doi.org/10.1111/cobi.13135>
- 546 Chesson, P. (2000). Mechanisms of Maintenance of Species Diversity. *Annual Review*  
547 *of Ecology and Systematics*, 31(1), 343–366.  
548 <https://doi.org/10.1146/annurev.ecolsys.31.1.343>
- 549 Clark, D. A., Piper, S. C., Keeling, C. D., & Clark, D. B. (2003). Tropical rain forest tree  
550 growth and atmospheric carbon dynamics linked to interannual temperature  
551 variation during 1984–2000. *Proceedings of the National Academy of Sciences of*  
552 *the United States of America*, 100(10), 5852–5857.  
553 <https://doi.org/10.1073/pnas.0935903100>
- 554 Clark, J. S., Bell, D., Chu, C., Courbaud, B., Dietze, M., Hersh, M., ... Wyckoff, P.  
555 (2010). High-dimensional coexistence based on individual variation: A synthesis of  
556 evidence. *Ecological Monographs*, 80(4), 569–608. <https://doi.org/10.1890/09-1541.1>  
557
- 558 Comas, L. H., Bouma, T. J., & Eissenstat, D. M. (2002). Linking root traits to potential  
559 growth rate in six temperate tree species. *Oecologia*, 132(1), 34–43.  
560 <https://doi.org/10.1007/s00442-002-0922-8>
- 561 Comas, LH and Eissenstat, D. (2004). Linking Fine Root Traits to Maximum Potential  
562 Growth Rate among 11 Mature Temperate Tree Species. *Functional Ecology*,  
563 388–397.



564 Conrad, O., Bechtel, B., Bock, M., Dietrich, H., Fischer, E., Gerlitz, L., ... Böhner, J.  
565 (2015). System for Automated Geoscientific Analyses (SAGA) v. 2.1.4.  
566 *Geoscientific Model Development*, 8(7), 1991–2007. [https://doi.org/10.5194/gmd-](https://doi.org/10.5194/gmd-8-1991-2015)  
567 [8-1991-2015](https://doi.org/10.5194/gmd-8-1991-2015)

568 Craven, D., Hall, J. S., Berlyn, G. P., Ashton, M. S., & van Breugel, M. (2015).  
569 Changing gears during succession: shifting functional strategies in young tropical  
570 secondary forests. *Oecologia*, 179(1), 293–305. [https://doi.org/10.1007/s00442-](https://doi.org/10.1007/s00442-015-3339-x)  
571 [015-3339-x](https://doi.org/10.1007/s00442-015-3339-x)

572 Dalling, J. W., Swaine, M. D., & Garwood, N. C. (1998). Dispersal patterns and seed  
573 bank dynamics of pioneer trees in moist tropical forest. *Ecology*, 79(2), 564–578.  
574 [https://doi.org/10.1890/0012-9658\(1998\)079\[0564:DPASBD\]2.0.CO;2](https://doi.org/10.1890/0012-9658(1998)079[0564:DPASBD]2.0.CO;2)

575 de Aguiar-Campos, N., Coelho de Souza, F., Maia, V. A., Rezende, V. L., de Souza, C.  
576 R., de Paula, G. G. P., ... dos Santos, R. M. (2021). Evolutionary constraints on  
577 tree size and above-ground biomass in tropical dry forests. *Journal of Ecology*,  
578 109(4), 1690–1702. <https://doi.org/10.1111/1365-2745.13589>

579 de Souza, C. F., Dexter, K. G., Phillips, O. L., Brien, R. J. W., Chave, J., Galbraith, D.  
580 R., ... Baker, T. R. (2016). Evolutionary heritage influences Amazon tree ecology.  
581 *Proceedings. Biological Sciences*, 283(1844)

582 dos Santos, V. A. H. F., & Ferreira, M. J. (2020). Are photosynthetic leaf traits related to  
583 the first-year growth of tropical tree seedlings? A light-induced plasticity test in a  
584 secondary forest enrichment planting. *Forest Ecology and Management*,  
585 460(January), 117900. <https://doi.org/10.1016/j.foreco.2020.117900>

586 Engelbrecht, B. M. J., Comita, L. S., Condit, R., Kursar, T. A., Tyree, M. T., Turner, B.  
587 L., & Hubbell, S. P. (2007). Drought sensitivity shapes species distribution patterns  
588 in tropical forests. *Nature*, 447(7140), 80–82. <https://doi.org/10.1038/nature05747>

589 Ferry, B., Morneau, F., Bontemps, J.-D., Blanc, L., & Freycon, V. (2010). Higher treefall  
590 rates on slopes and waterlogged soils result in lower stand biomass and  
591 productivity in a tropical rain forest. *Journal of Ecology*, 98(1), 106–116.  
592 <https://doi.org/10.1111/j.1365-2745.2009.01604.x>

593 Fine, P. V. A., Zapata, F., & Daly, D. C. (2014). Investigating processes of neotropical  
594 rain forest tree diversification by examining the evolution and historical  
595 biogeography of the proteae (Burseraceae). *Evolution*, 68(7), 1988–2004.  
596 <https://doi.org/10.1111/evo.12414>

597 Fortunel, C., Lasky, J. R., Uriarte, M., Valencia, R., Wright, S. J., Garwood, N. C., &  
598 Kraft, N. J. B. (2018). Topography and neighborhood crowding can interact to  
599 shape species growth and distribution in a diverse Amazonian forest. *Ecology*.  
600 <https://doi.org/10.1002/ecy.2441>

- 601 Grattapaglia, D., Plomion, C., Kirst, M., & Sederoff, R. R. (2009, April 1). Genomics of  
602 growth traits in forest trees. *Current Opinion in Plant Biology*. Elsevier Current  
603 Trends. <https://doi.org/10.1016/j.pbi.2008.12.008>
- 604 Grömping, U. (2006). Relative importance for linear regression in R: The package  
605 relaimpo. *Journal of Statistical Software*, 17(1), 1–27.  
606 <https://doi.org/10.18637/jss.v017.i01>
- 607 Gibert, A., Gray, E. F., Westoby, M., Wright, I. J., & Falster, D. S. (2016). On the link  
608 between functional traits and growth rate: meta-analysis shows effects change  
609 with plant size, as predicted. *Journal of Ecology*, 104(5), 1488–1503.  
610 <https://doi.org/10.1111/1365-2745.12594>
- 611 Gourlet-Fleury, S., Guehl, J.-M., & Laroussine, O. (2004). *Ecology and management of*  
612 *a neotropical rainforest□: lessons drawn from Paracou, a long-term experimental*  
613 *research site in French Guiana Ecology and management of a neotropical*  
614 *rainforest□: lessons drawn from Paracou, a long-term experimental research sit.*  
615 Paris: Elsevier. Retrieved from <http://agritrop.cirad.fr/522004/>
- 616 Herault, B., Ouallet, J., Blanc, L., Wagner, F., & Baraloto, C. (2010). Growth responses  
617 of neotropical trees to logging gaps. *Journal of Applied Ecology*, 47(4), 821–831.  
618 <https://doi.org/10.1111/j.1365-2664.2010.01826.x>
- 619 Hérault, B., Bachelot, B., Poorter, L., Rossi, V., Bongers, F., Chave, J., ... Baraloto, C.  
620 (2011). Functional traits shape ontogenetic growth trajectories of rain forest tree  
621 species: Plant traits shape growth trajectory. *Journal of Ecology*, 99(6), 1431–  
622 1440. <https://doi.org/10.1111/j.1365-2745.2011.01883.x>
- 623 Hérault, B., & Piponiot, C. (2018). Key drivers of ecosystem recovery after disturbance  
624 in a neotropical forest. *Forest Ecosystems*, 5(1), 2. [https://doi.org/10.1186/s40663-](https://doi.org/10.1186/s40663-017-0126-7)  
625 [017-0126-7](https://doi.org/10.1186/s40663-017-0126-7)
- 626 John, R., Dalling, J. W., Harms, K. E., Yavitt, J. B., Stallard, R. F., Mirabello, M., ...  
627 Foster, R. B. (2007). Soil nutrients influence spatial distributions of tropical tree  
628 species. *Proceedings of the National Academy of Sciences of the United States of*  
629 *America*, 104(3), 864–9. <https://doi.org/10.1073/pnas.0604666104>
- 630 Keck, F., Rimet, F., Bouchez, A., & Franc, A. (2016). phylosignal: an R package to  
631 measure, test, and explore the phylogenetic signal. *Ecology and Evolution*, 6(9),  
632 2774–2780. <https://doi.org/10.1002/ece3.2051>
- 633 King, D. A., Davies, S. J., Nur Supardi, M. N., & Tan, S. (2005). Tree growth is related  
634 to light interception and wood density in two mixed dipterocarp forests of Malaysia.  
635 *Functional Ecology*, 19(3), 445–453. [https://doi.org/10.1111/j.1365-](https://doi.org/10.1111/j.1365-2435.2005.00982.x)  
636 [2435.2005.00982.x](https://doi.org/10.1111/j.1365-2435.2005.00982.x)
- 637 Körner, C. (2017). A matter of tree longevity. *Science*, 355(6321), 130–131.  
638 <https://doi.org/10.1126/science.aal2449>

- 639 Kupers, S. J., Engelbrecht, B. M. J., Hernández, A., Wright, S. J., Wirth, C., & Rüger, N.  
640 (2019). Growth responses to soil water potential indirectly shape local species  
641 distributions of tropical forest seedlings. *Journal of Ecology*, 107(2), 860–874.  
642 <https://doi.org/10.1111/1365-2745.13096>
- 643 Le Bec, J., Courbaud, B., Moguédec, G. Le, & Pélissier, R. (2015). Characterizing  
644 tropical tree species growth strategies: Learning from inter-individual variability and  
645 scale invariance. *PLoS ONE*, 10(3), e0117028.  
646 <https://doi.org/10.1371/journal.pone.0117028>
- 647 Lewis, S. L., & Tanner, E. V. J. (2000). Effects of above- and belowground competition  
648 on growth and survival of rain forest tree seedlings. *Ecology*, 81(9), 2525–2538.  
649 [https://doi.org/10.1890/0012-9658\(2000\)081\[2525:EOAABC\]2.0.CO;2](https://doi.org/10.1890/0012-9658(2000)081[2525:EOAABC]2.0.CO;2)
- 650 Lichstein, J. W., Dushoff, J., Levin, S. A., & Pacala, S. W. (2007). Intraspecific Variation  
651 and Species Coexistence. *The American Naturalist*, 170(6), 807–818.  
652 <https://doi.org/10.1086/522937>
- 653 Martinez-Ramos, M., Alvarez-Buylla, E., & Sarukhan, J. (1989). Tree Demography and  
654 Gap Dynamics in a Tropical Rain Forest. *Ecology*, 70(3), 555–558.  
655 <https://doi.org/10.2307/1940203>
- 656 Molino, J.-F., & Sabatier, D. (2001). Tree Diversity in Tropical Rain Forests: A  
657 Validation of the Intermediate Disturbance Hypothesis. *Science*, 294(5547), 1702–  
658 1704. <https://doi.org/10.1126/science.1060284>
- 659 Nakagawa, S., & Schielzeth, H. (2013). A general and simple method for obtaining R<sup>2</sup>  
660 from generalized linear mixed-effects models. *Methods in Ecology and Evolution*,  
661 4(2), 133–142. <https://doi.org/10.1111/j.2041-210x.2012.00261.x>
- 662 O'Brien, M. J., & Escudero, A. (2021). Topography in tropical forests enhances growth  
663 and survival differences within and among species via water availability and biotic  
664 interactions. *Functional Ecology*, (June), 1–13. <https://doi.org/10.1111/1365-2435.13977>
- 665  
666 Osazuwa-Peters, O. L., Wright, S. J., & Zanne, A. E. (2017). Linking wood traits to vital  
667 rates in tropical rainforest trees: Insights from comparing sapling and adult wood.  
668 *American Journal of Botany*, 104(10), 1464–1473.  
669 <https://doi.org/10.3732/ajb.1700242>
- 670 Paquette, A., Joly, S., & Messier, C. (2015). Explaining forest productivity using tree  
671 functional traits and phylogenetic information: Two sides of the same coin over  
672 evolutionary scale? *Ecology and Evolution*, 5(9), 1774–1783.  
673 <https://doi.org/10.1002/ece3.1456>
- 674 Peña-Claros, M., Fredericksen, T. S., Alarcón, A., Blate, G. M., Choque, U., Leaño, C.,  
675 ... Putz, F. E. (2008). Beyond reduced-impact logging: Silvicultural treatments to  
676 increase growth rates of tropical trees. *Forest Ecology and Management*, 256(7),  
677 1458–1467. <https://doi.org/10.1016/j.foreco.2007.11.013>

- Philipson, C. D., Dent, D. H., O'Brien, M. J., Chamagne, J., Dzulkifli, D., Nilus, R., ... Hector, A. (2014). A trait-based trade-off between growth and mortality: Evidence from 15 tropical tree species using size-specific relative growth rates. *Ecology and Evolution*, 4(18), 3675–3688. <https://doi.org/10.1002/ece3.1186>
- Poorter, L., McDonald, I., Alarcón, A., Fichtler, E., Licona, J. C., Peña-Claros, M., ... Sass-Klaassen, U. (2010). The importance of wood traits and hydraulic conductance for the performance and life history strategies of 42 rainforest tree species. *New Phytologist*, 185(2), 481–492. <https://doi.org/10.1111/j.1469-8137.2009.03092.x>
- Poorter, L., Castilho, C. V., Schiatti, J., Oliveira, R. S., & Costa, F. R. C. (2018). Can traits predict individual growth performance? A test in a hyperdiverse tropical forest. *New Phytologist*, 219(1), 109–121. <https://doi.org/10.1111/nph.15206>
- Potvin, C., & Gotelli, N. J. (2008). Biodiversity enhances individual performance but does not affect survivorship in tropical trees. *Ecology Letters*, 11(3), 217–223. <https://doi.org/10.1111/j.1461-0248.2007.01148.x>
- R Core Team. (2020). R: A Language and Environment for Statistical Computing. Vienna, Austria.
- Rees, M., Osborne, C. P., Woodward, F. I., Hulme, S. P., Turnbull, L. A., & Taylor, S. H. (2010). Partitioning the components of relative growth rate: How important is plant size variation? *American Naturalist*, 176(6). <https://doi.org/10.1086/657037>
- Reich, P. B. (2014). The world-wide “fast–slow” plant economics spectrum: a traits manifesto. *Journal of Ecology*, 102(2), 275–301. <https://doi.org/10.1111/1365-2745.12211>
- Rüger, N., Berger, U., Hubbell, S. P., Vieilledent, G., & Condit, R. (2011). Growth strategies of tropical tree species: Disentangling light and size effects. *PLoS ONE*, 6(9), e25330. <https://doi.org/10.1371/journal.pone.0025330>
- Rüger, N., Condit, R., Dent, D. H., DeWalt, S. J., Hubbell, S. P., Lichstein, J. W., ... Farrior, C. E. (2020). Demographic trade-offs predict tropical forest dynamics. *Science*, 368(6487), 165–168. <https://doi.org/10.1126/science.aaz4797>
- Russo, S. E., Brown, P., Tan, S., & Davies, S. J. (2008). Interspecific demographic trade-offs and soil-related habitat associations of tree species along resource gradients. *Journal of Ecology*, 96(1), 192–203. <https://doi.org/10.1111/j.1365-2745.2007.01330.x>
- Schmitt, S., Hérault, B., Ducouret, É., Baranger, A., Tysklind, N., Heuertz, M., ... Derroire, G. (2020). Topography consistently drives intra- and inter-specific leaf trait variation within tree species complexes in a Neotropical forest. *Oikos*, 129(10), 1521–1530. <https://doi.org/10.1111/oik.07488>
- Schmitt, S., Maréchaux, I., Chave, J., Fischer, F. J., Pioniot, C., Traissac, S., & Hérault, B. (2020b). Functional diversity improves tropical forest resilience:

717           Insights from a long-term virtual experiment. *Journal of Ecology*, 108(3), 831–843.  
718           <https://doi.org/10.1111/1365-2745.13320>

719           Schmitt, S., Tysklind, N., Hérault, B., & Heuertz, M. (2021). Topography drives  
720           microgeographic adaptations of closely related species in two tropical tree species  
721           complexes. *Molecular Ecology*, mec.16116. <https://doi.org/10.1111/mec.16116>

722           Schmitt, S., Tysklind, N., Derroire, G., Heuertz, M., & Hérault, B. (2021b). Topography  
723           shapes the local coexistence of tree species within species complexes of  
724           Neotropical forests. *Oecologia*, 196(2), 389–398. [https://doi.org/10.1007/s00442-](https://doi.org/10.1007/s00442-021-04939-2)  
725           [021-04939-2](https://doi.org/10.1007/s00442-021-04939-2)

726           Schmitt, S., Tysklind, N., Heuertz, M., & Hérault, B. (2022). Selection in space and time:  
727           Individual tree growth is adapted to tropical forest gap dynamics. *Molecular*  
728           *Ecology*, (July 2021), 1–11. <https://doi.org/10.1111/mec.16392>

729           Stan Development Team. (2018). Rstan: the R interface to Stan. Retrieved from  
730           <http://mc-stan.org/>

731           Svenning, J. C., Eiserhardt, W. L., Normand, S., Ordonez, A., & Sandel, B. (2015). The  
732           Influence of Paleoclimate on Present-Day Patterns in Biodiversity and  
733           Ecosystems. *Annual Review of Ecology, Evolution, and Systematics*, 46, 551–572.  
734           <https://doi.org/10.1146/annurev-ecolsys-112414-054314>

735           Swenson, N. G. (2013). The assembly of tropical tree communities - the advances and  
736           shortcomings of phylogenetic and functional trait analyses. *Ecography*, 36(3), 264–  
737           276. <https://doi.org/10.1111/j.1600-0587.2012.00121.x>

738           Swenson, N. G. (2014). Phylogenetic imputation of plant functional trait databases.  
739           *Ecography*, 37(2), 105–110. <https://doi.org/10.1111/j.1600-0587.2013.00528.x>

740           Tucker, C. M., Davies, T. J., Cadotte, M. W., & Pearse, W. D. (2018). On the  
741           relationship between phylogenetic diversity and trait diversity. *Ecology*, 99(6),  
742           1473–1479. <https://doi.org/10.1002/ecy.2349>

743           Umaña, M. N., Zhang, C., Cao, M., Lin, L., & Swenson, N. G. (2015). Commonness,  
744           rarity, and intraspecific variation in traits and performance in tropical tree  
745           seedlings. *Ecology Letters*, 18(12), 1329–1337. <https://doi.org/10.1111/ele.12527>

746           Umaña, M. N., Zipkin, E. F., Zhang, C., Cao, M., Lin, L., & Swenson, N. G. (2018).  
747           Individual-level trait variation and negative density dependence affect growth in  
748           tropical tree seedlings. *Journal of Ecology*, 106(6), 2446–2455.  
749           <https://doi.org/10.1111/1365-2745.13001>

750           Uriarte, M., Canham, C. D., Thompson, J., & Zimmerman, J. K. (2004). A neighborhood  
751           analysis of tree growth and survival in a hurricane-driven tropical forest. *Ecological*  
752           *Monographs*, 74(4), 591–614. <https://doi.org/10.1890/03-4031>

753           Uriarte, M., Condit, R., Canham, C. D., & Hubbell, S. P. (2004). A spatially explicit  
754           model of sapling growth in a tropical forest: Does the identity of neighbours



- 755 matter? *Journal of Ecology*, 92(2), 348–360. <https://doi.org/10.1111/j.0022->  
756 [0477.2004.00867.x](https://doi.org/10.1111/j.0022-0477.2004.00867.x)
- 757 Vehtari, A., Gelman, A., & Gabry, J. (2017). Practical Bayesian model evaluation using  
758 leave-one-out cross-validation and WAIC. *Statistics and Computing*, 27(5), 1413–  
759 1432. <https://doi.org/10.1007/s11222-016-9696-4>
- 760 Violle, C., Navas, M.-L., Vile, D., Kazakou, E., Fortunel, C., Hummel, I., & Garnier, E.  
761 (2007). Let the concept of trait be functional! *Oikos*, 116(5), 882–892.  
762 <https://doi.org/10.1111/j.0030-1299.2007.15559.x>
- 763 Visser, M. D., Bruijning, M., Wright, S. J., Muller-Landau, H. C., Jongejans, E., Comita,  
764 L. S., & de Kroon, H. (2016). Functional traits as predictors of vital rates across the  
765 life cycle of tropical trees. *Functional Ecology*, 30(2), 168–180.  
766 <https://doi.org/10.1111/1365-2435.12621>
- 767 Vleminckx, J., Fortunel, C., Valverde-Barrantes, O., Timothy Paine, C. E., Engel, J.,  
768 Petronelli, P., ... Baraloto, C. (2021). Resolving whole-plant economics from leaf,  
769 stem and root traits of 1467 Amazonian tree species. *Oikos*, 130(7), 1193–1208.  
770 <https://doi.org/10.1111/oik.08284>
- 771 Wagner, F., Rossi, V., Stahl, C., Bonal, D., & Hérault, B. (2012). Water availability is the  
772 main climate driver of neotropical tree growth. *PLoS ONE*, 7(4), e34074.  
773 <https://doi.org/10.1371/journal.pone.0034074>
- 774 Wickham, H., Averick, M., Bryan, J., Chang, W., McGowan, L., François, R., ... Yutani,  
775 H. (2019). Welcome to the Tidyverse. *Journal of Open Source Software*, 4(43),  
776 1686. <https://doi.org/10.21105/joss.01686>
- 777 Wright, S. J., Kitajima, K., Kraft, N. J. B., Reich, P. B., Wright, I. J., Bunker, D. E., ...  
778 Zanne, A. E. (2010). Functional traits and the growth-mortality trade-off in tropical  
779 trees. *Ecology*, 91(12), 3664–3674. <https://doi.org/10.1890/09-2335.1>
- 780 Xiang, W., Wu, W., Tong, J., Deng, X., Tian, D., Zhang, L., ... Peng, C. (2013).  
781 Differences in fine root traits between early and late-successional tree species in a  
782 Chinese subtropical forest. *Forestry*, 86(3), 343–351.  
783 <https://doi.org/10.1093/forestry/cpt003>
- 784 Yang, J., Cao, M., & Swenson, N. G. (2018). Why Functional Traits Do Not Predict Tree  
785 Demographic Rates. *Trends in Ecology and Evolution*, 33(5), 326–336.  
786 <https://doi.org/10.1016/j.tree.2018.03.003>
- 787 Yu, G. (2020). Using ggtree to Visualize Data on Tree-Like Structures. *Current*  
788 *Protocols in Bioinformatics*, 69(1), 1–18. <https://doi.org/10.1002/cpbi.96>
